# Supplementary material for: Extra-epitopic hepatitis C virus polymorphisms confer resistance to broadly neutralizing antibodies by modulating binding to scavenger receptor B1
Source: PubMed Central journal article supplement (PMC5342271; doi:10.1371/journal.ppat.1006235), 2017-02-24

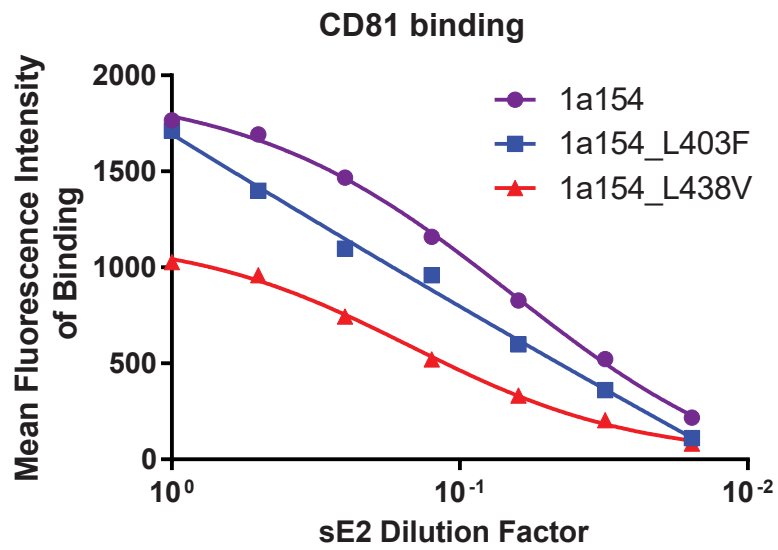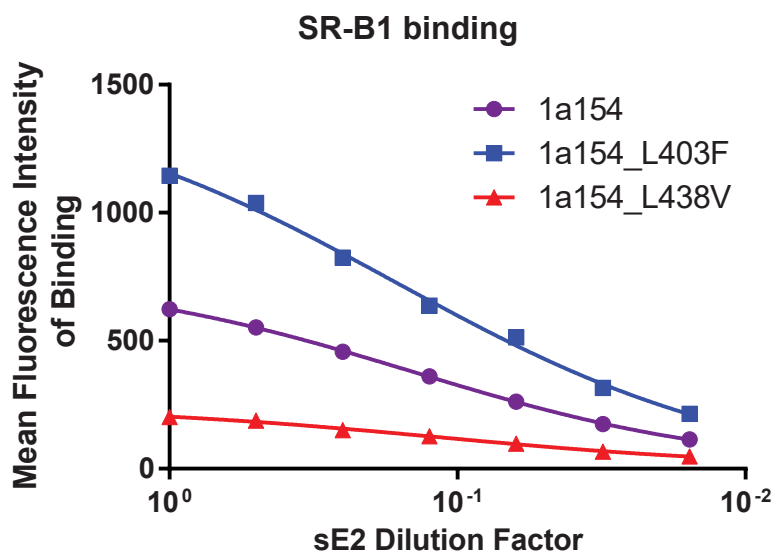

Supplement: ppat.1006235.s004.pdf [file ppat.1006235.s004.pdf]
